# Supplementary material
Source: publisher site journal article supplement (https://www.dovepress.com/get_supplementary_file.php?f=388726.docx)
Supplement: Supplementary file 1 [file get_supplementary_file.php]

**Table S1.** Comparison of different age groups.

| **Variable** | **Group A** | **Group B** | ***p value*** |
| --- | --- | --- | --- |
| **35 years old and over** |  |  |  |
| **Number of cases (n)** | 14 | 146 |  |
| **Retrieved oocyte count (n）** | 13.6±7.0 | 13.2±5.5 | 0.82 |
| **M****Ⅱ oocyte count (n)** | 11.9±6.9 | 12.3±5.3 | 0.68 |
| **Normal fertilized oocyte count (n)** | 10.0±5.9 | 9.8±4.9 | 0.99 |
| **Good-quality embryos count (n)** | 5.1±4.2 | 4.5±3.3 | 0.72 |
| **MⅡ oocyte rate (%)** | 86.1±11.6 | 91.0±10.1 | 0.09 |
| **Normal fertilization rate (%)** | 90.7±11.4 | 90.5±11.1 | 0.91 |
| **Good-quality embryos rate (%)** | 45.7±26.7 | 41.9±24.0 | 0.46 |
| **Incidence of OHSS (%)** | 7.1 (1/14) | 8.9 (13/146) | 0.82 |
| **fET Clinical pregnancy rate** | 50% (5/10) | 47.6% (50/105) | 0.89 |
| **34 years old and less** |  |  |  |
| **Number of cases (n)** | 395 | 2045 |  |
| **Retrieved oocyte count (n）** | 16.6±6.3 | 14.0±5.5 | <0.01 |
| **MⅡ oocyte count (n)** | 15.4±6.3 | 12.9±5.3 | <0.01 |
| **Normal fertilized oocyte count (n)** | 12.0±5.4 | 10.2±4.6 | <0.01 |
| **Good-quality embryos count (n)** | 6.2±4.0 | 5.1±3.3 | <0.01 |
| **MⅡ oocyte rate (%)** | 92.7±10.2 | 91.8±7.1 | <0.01 |
| **Normal fertilization rate (%)** | 89.8±10.9 | 90.8±11.3 | 0.12 |
| **Good-quality embryos rate (%)** | 46.0±21.8 | 44.5±22.4 | 0.29 |
| **Incidence of OHSS (%)** | 11.1 (44/395) | 7.4 (151/2045) | <0.01 |
| **fET Clinical pregnancy rate** | 76.6% (151/197) | 71.1% (961/1352) | 0.11 |

OHSS, Ovarian Hyper-stimulation Syndrome; fET, fresh embryo transfer.

**Table S2.** Comparison of different kinds of LH groups.

| **Variable** | **Group B1** | **Group B2** | ***p value*** |
| --- | --- | --- | --- |
| **Number of cases (n)** | rLH（n=1148） | HMG（n=1043） |  |
| **Gn duration (d)** | 12.5±2.7 | 14.0±3.4 | <0.01 |
| **Retrieved oocyte count (n）** | 14.3±5.3 | 13.5±5.8 | <0.01 |
| **MⅡ oocyte count (n)** | 13.1±5.1 | 12.6±5.6 | <0.01 |
| **Normal fertilized oocyte count (n)** | 10.3±4.4 | 10.0±4.9 | 0.01 |
| **Good-quality embryos count (n)** | 5.1±3.3 | 4.9±3.3 | 0.03 |
| **MⅡ oocyte rate (%)** | 90.4±7.7 | 93.2±6.6 | <0.01 |
| **Normal fertilization rate (%)** | 90.8±10.9 | 90.7±11.8 | 0.67 |
| **Good-quality embryos rate (%)** | 44.8±22.7 | 43.7±22.3 | 0.21 |
| **Incidence of OHSS (%)** | 8.6 (99/1148) | 6.2 (65/1043) | 0.03 |
| **Em (mm)** | 12.1±2.6 | 12.1±2.6 | 0.79 |
| **fET Clinical pregnancy rate** | 68.0% (504/741) | 70.8% (507/716) | 0.25 |

OHSS, Ovarian Hyper-stimulation Syndrome; Em, Endometrial thickness; fET, fresh embryo transfer.

**Table S3.** Univariate analysis of fET cycles.

| **Total cycles** | **Adjusted OR** | **95% CI** | **p value** |
| --- | --- | --- | --- |
| **Baseline characteristics** |  |  |  |
| **Age (y)** | 0.914 | 0.886-0.942 | <0.01 |
| **BMI (kg/m2)** | 1.021 | 0.991-1.053 | 0.18 |
| **Duration of infertility (y)** | 1.003 | 0.955-1.054 | 0.89 |
| **AFC (n)** | 1.051 | 1.021-1.081 | <0.01 |
| **FSH levels (mIU/mL)** | 1.032 | 0.971-1.097 | 0.31 |
| **LH levels (mIU/mL)** | 1.025 | 1.003-1.047 | 0.02 |
| **Medication during stimulation** |  |  |  |
| **Starting doses of Gn (IU)** | 0.996 | 0.992-0.999 | 0.02 |
| **Total doses of Gn (IU)** | 0.999 | 0.999-1.001 | 0.26 |
| **Gn duration (d)** | 1.007 | 0.974-1.041 | 0.68 |
| **Hormone variation on trigger day** |  |  |  |
| **LH (mIU/mL)** | 0.931 | 0.809-1.070 | 0.31 |
| **E2 (pg/mL)** | 0.999 | 0.999-1.001 | 0.58 |
| **P (ng/mL)** | 1.235 | 0.974-1.565 | 0.08 |
| **Em (mm)** | 0.996 | 0.956-1.037 | 0.83 |
| **Over 14 mm oocyte count (n)** | 0.998 | 0.961-1.036 | 0.90 |
| **Retrieved oocyte count (n)** | 1.051 | 1.024-1.079 | <0.01 |
| **MⅡ oocyte count (n)** | 1.052 | 1.024-1.081 | <0.01 |
| **Normal fertilized oocyte count (n)** | 1.040 | 1.009-1.071 | 0.01 |
| **Good-quality embryos count (n)** | 1.042 | 1.002-1.084 | 0.04 |
| **MⅡ oocyte rate (%)** | 1.416 | 0.394-5.089 | 0.59 |
| **Normal fertilization rate (%)** | 0.666 | 0.266-1.668 | 0.39 |
| **Good-quality embryos rate (%)** | 1.511 | 0.945-2.416 | 0.08 |
| **Number of embryos transferred** | 1.814 | 1.462-2.248 | <0.01 |
| **LH supplementation** | 0.741 | 0.530-1.036 | 0.08 |

fET, fresh embryo transfer; BMI, Body mass index; AFC, Antral follicle count; FSH, Follicle-Stimulating Hormone; LH, Luteinizing Hormone; E2, Oestradiol; P, progesterone; Em, Endometrial thickness.

**Table S4.** Univariate analysis of fET cycles after Propensity-Score Matching.

| **Total cycles** | **Adjusted OR** | **95% CI** | **p value** |
| --- | --- | --- | --- |
| **Baseline characteristics** |  |  |  |
| **Age (y)** | 0.943 | 0.893-0.996 | 0.03 |
| **BMI (kg/m2)** | 1.033 | 0.975-1.094 | 0.27 |
| **Duration of infertility (y)** | 0.992 | 0.901-1.092 | 0.87 |
| **AFC (n)** | 1.060 | 1.009-1.115 | 0.02 |
| **FSH levels (mIU/mL)** | 0.979 | 0.878-1.091 | 0.70 |
| **LH levels (mIU/mL)** | 1.021 | 0.989-1.055 | 0.20 |
| **Medication during stimulation** |  |  |  |
| **Starting doses of Gn (IU)** | 0.994 | 0.987-1.001 | 0.09 |
| **Total doses of Gn (IU)** | 0.999 | 0.999-1.001 | 0.38 |
| **Gn duration (d)** | 1.007 | 0.974-1.041 | 0.68 |
| **Hormone variation on trigger day** |  |  |  |
| **LH (mIU/mL)** | 1.059 | 0.846-1.327 | 0.62 |
| **E2 (pg/mL)** | 0.999 | 0.999-1.001 | 0.61 |
| **P (ng/mL)** | 1.135 | 0.744-1.732 | 0.56 |
| **Em (mm)** | 1.033 | 0.961-1.111 | 0.38 |
| **Over 14 mm oocyte count (n)** | 1.003 | 0.943-1.066 | 0.93 |
| **Retrieved oocyte count (n)** | 1.044 | 1.000-1.091 | 0.05 |
| **MⅡ oocyte count (n)** | 1.056 | 1.009-1.105 | 0.02 |
| **Normal fertilized oocyte count (n)** | 1.075 | 1.020-1.132 | <0.01 |
| **Good-quality embryos count (n)** | 1.045 | 0.980-1.114 | 0.18 |
| **MⅡ oocyte rate (%)** | 1.365 | 1.038-1.410 | 0.04 |
| **Normal fertilization rate (%)** | 0.632 | 0.128-3.122 | 0.57 |
| **Good-quality embryos rate (%)** | 0.995 | 0.455-2.173 | 0.99 |
| **Number of embryos transferred** | 1.915 | 1.336-2.745 | <0.01 |
| **LH supplementation** | 0.743 | 0.507-1.090 | 0.13 |

fET, fresh embryo transfer; BMI, Body mass index; AFC, Antral follicle count; FSH, Follicle-Stimulating Hormone; LH, Luteinizing Hormone; E2, Estradiol; P, progesterone; Em, Endometrial thickness.
